# Supplementary material for: Human biomonitoring and exposure risk assessment to phthalates, parabens, benzophenone-3, bisphenols and triclosan in the adult population of Kinshasa, Democratic Republic of Congo (D.R.C): a cross-sectional study
Source: Research Square preprint supplement (doi:10.21203/rs.3.rs-8473872/v1), 2026-01-20
Supplement: Supplementary file 1 [file 8e157c6095ac15004be2e8ba.docx]

| Table S1: Contamination of the Kinshasa population according to sex | | | | |
| --- | --- | --- | --- | --- |
| Variable | Pollutant | Median (µg/L) | | P-value |
| **Males** | **Females** |
| ***Sex*** | MeP | 35.5 | 136 | **0.002** |
|  | EtP | 0.131 | 0.131 | 0.059 |
|  | PrP | 5.14 | 16.1 | **0.010** |
|  | nBP | 0.061 | 0.061 | 0.249 |
|  | MEP | 55.3 | 70.8 | 0.248 |
|  | MiBP | 18.1 | 15.4 | 0.616 |
|  | MnBP | 79.4 | 67.2 | 0.409 |
|  | MBzP | 0.31 | 0.71 | 0.498 |
|  | MEHP | 3.99 | 2.45 | **0.016** |
|  | 5-OH-MEHP | 13.1 | 8.89 | **0.003** |
|  | 5-oxo-MEHP | 7.05 | 5.52 | 0.072 |
|  | 6-OH-PrHpP | 0.131 | 0.131 | 0.465 |
|  | 7-cxOP | 2.98 | 2.74 | 0.605 |
|  | cx-MINCH | 0.131 | 0.131 | 0.91 |
|  | OH-MINCH | 0.111 | 0.111 | 0.088 |
|  | BP-3 | 1.16 | 2.31 | **0.002** |
|  | BPA | 1.66 | 1.22 | **0.029** |
|  | BPF | 0.129 | 0.131 | 0.484 |
|  | BPZ | 0.00025 | 0.00782 | 0.116 |
|  | TCS | 44.4 | 52.7 | 0.376 |

| Table S2: Contamination of the Kinshasa population according to district and BMI | | | | | | |
| --- | --- | --- | --- | --- | --- | --- |
| Variable | Pollutant | Median (µg/L) | | | | P-value |
| **Tshangu** | **Mont Amba** | **Funa** | **Lukunga** |
| ***Area of residence*** | MeP | 79.5 | 69.4 | 58.9 | 30.3 | 0.449 |
|  | EtP | 0.84 | 0.22 | 0.13 | 0.13 | **0.016** |
|  | PrP | 11.5 | 9.93 | 9.20 | 5.80 | 0.182 |
|  | nBP | 0.061 | 0.061 | 0.061 | 0.061 | 0.626 |
|  | MEP | 66.3 | 52.1 | 92.5 | 82.7 | 0.992 |
|  | MiBP | 15.3 | 16.1 | 18.8 | 16.1 | 0.787 |
|  | MnBP | 75.2 | 65.2 | 83.2 | 79.4 | 0.944 |
|  | MBzP | 0.31 | 0.47 | 0.64 | 0.75 | 0.959 |
|  | MEHP | 3.83 | 3.05 | 3.09 | 2.31 | 0.648 |
|  | 5-OH-MEHP | 12.7 | 12.3 | 9.58 | 11.4 | 0.281 |
|  | 5-oxo-MEHP | 8.32 | 7.32 | 5.66 | 6.33 | 0.296 |
|  | 6-OH-PrHpP | 0.131 | 0.131 | 0.131 | 0.131 | 0.545 |
|  | 7-cxOP | 3.80 | 2.24 | 3.77 | 2.13 | **0.037** |
|  | cx-MINCH | 0.131 | 0.131 | 0.131 | 0.131 | 0.436 |
|  | OH-MINCH | 0.111 | 0.111 | 0.111 | 0.111 | 0.295 |
|  | BP-3 | 1.20 | 1.41 | 1.99 | 1.48 | 0.276 |
|  | BPA | 1.58 | 1.48 | 1.62 | 1.51 | 0.718 |
|  | BPF | 0.0968 | 0.188 | 0.0897 | 0.130 | **0.017** |
|  | BPZ | 0.000 | 0.00175 | 0.0036 | 0.0078 | 0.858 |
|  | TCS | 46.4 | 60.8 | 52.2 | 32.6 | 0.402 |
| ***BMI*** |  | **<18.5** | **18.5-24.9** | **25.0-29.9** | **≥30** |  |
|  | MeP | 79.5 | 39.5 | 72.1 | 162 | 0.097 |
|  | EtP | 1.41 | 0.13 | 0.32 | 0.32 | 0.052 |
|  | PrP | 14.7 | 3.98 | 11.9 | 10.3 | 0.125 |
|  | nBP | 0.53 | 0.061 | 0.061 | 0.061 | 0.074 |
|  | MEP | 10.1 | 37.9 | 90.2 | 87.6 | **0.029** |
|  | MiBP | 11.9 | 15.9 | 18.6 | 18.7 | 0.455 |
|  | MnBP | 71.8 | 68.5 | 87.1 | 78.9 | 0.344 |
|  | MBzP | 0.31 | 0.68 | 0.31 | 0.62 | 0.966 |
|  | MEHP | 1.40 | 4.05 | 2.50 | 3.63 | 0.221 |
|  | 5-OH-MEHP | 10.1 | 11.4 | 10.9 | 15.4 | 0.514 |
|  | 5-oxo-MEHP | 4.55 | 6.50 | 6.21 | 8.23 | 0.563 |
|  | 6-OH-PrHpP | 0.131 | 0.131 | 0.131 | 0.131 | 0.124 |
|  | 7-cxOP | 2.42 | 2.79 | 2.92 | 3.75 | 0.155 |
|  | cx-MINCH | 0.13 | 0.13 | 0.13 | 0.13 | 0.785 |
|  | OH-MINCH | 0.11 | 0.11 | 0.11 | 0.11 | 0.431 |
|  | BP-3 | 0.94 | 1.20 | 1.53 | 2.23 | 0.515 |
|  | BPA | 0.812 | 1.59 | 1.48 | 1.88 | 0.095 |
|  | BPF | 0.0842 | 0.127 | 0.130 | 0.130 | 0.335 |
|  | BPZ | 0.0075 | 0.0072 | 0.000 | 0.000 | 0.373 |
|  | TCS | 30.6 | 66.7 | 42.8 | 45.9 | 0.770 |

BMI : Body Mass Index

| Table S3: contamination of the Kinshasa population according to studied variables | | | | | |  |  |  |
| --- | --- | --- | --- | --- | --- | --- | --- | --- |
| Variable | Pollutant | Median (µg/L) | | | | | | P-value |
| **Drivers** | **Teachers** | **Traders** | **Student** | **Medical staff** | **Others** |
| ***Activities*** | MeP | 21.5 | 102 | 75.7 | 169 | 136 | 61.3 | 0.075 |
|  | EtP | 1.12 | 0.131 | 0.35 | 0.131 | 0.131 | 0.131 | 0.058 |
|  | PrP | 3.99 | 16.8 | 4.43 | 17.04 | 7.35 | 9.21 | 0.440 |
|  | nBP | 0.061 | 0.061 | 0.061 | 0.061 | 0.061 | 0.061 | 0.643 |
|  | MEP | 45.6 | 22.4 | 65.5 | 91.2 | 74.3 | 60.1 | 0.214 |
|  | MiBP | 28.1 | 7.47 | 23.4 | 24.3 | 15.7 | 17.6 | **<0.001** |
|  | MnBP | 98.9 | 27.3 | 75.7 | 132 | 87.3 | 80.5 | **<0.001** |
|  | MBzP | 0.70 | 0.31 | 0.74 | 0.81 | 0.47 | 0.71 | 0.117 |
|  | MEHP | 4.49 | 1.70 | 3.43 | 3.63 | 4.43 | 2.36 | 0.088 |
|  | 5-OH-MEHP | 19.4 | 4.16 | 13.5 | 12.1 | 12.7 | 9.86 | **<0.001** |
|  | 5-oxo-MEHP | 11.1 | 2.80 | 6.45 | 6.65 | 8.35 | 5.42 | **<0.001** |
|  | 6OH-PrHpP | 0.131 | 0.131 | 0.131 | 0.131 | 0.131 | 0.131 | 0.341 |
|  | 7-cxOP | 1.36 | 2.29 | 2.29 | 4.57 | 3.58 | 3.05 | 0.218 |
|  | cx-MINCH | 0.131 | 0.131 | 0.131 | 0.131 | 0.131 | 0.131 | 0.664 |
|  | OH-MINCH | 0.111 | 0.111 | 0.111 | 0.111 | 0.111 | 0.111 | 0.695 |
|  | BP-3 | 1.52 | 0.79 | 2.48 | 0.93 | 1.46 | 1.47 | 0.358 |
|  | BPA | 2.14 | 1.81 | 1.18 | 1.65 | 1.35 | 1.33 | 0.606 |
|  | BPF | 0.232 | 0.107 | 0.172 | 0.0755 | 0.0802 | 0.127 | 0.209 |
|  | BPZ | 0.0114 | 0.000 | 0.000 | 0.0102 | 0.000 | 0.000 | 0.201 |
|  | TCS | 72.8 | 44.2 | 50.2 | 29.6 | 52.7 | 45.7 | 0.786 |
| ***Age*** |  | **18-29 years** | **30-39 years** | **40-49 years** | **50-59 years** | **≥60 years** |  |  |
|  | MeP | 49.7 | 66.9 | 71.9 | 67.4 | 82.2 |  | 0.716 |
|  | EtP | 0.131 | 0.131 | 0.131 | 0.131 | 0.131 |  | 0.116 |
|  | PrP | 8.96 | 6.43 | 13.6 | 2.65 | 5.20 |  | 0.456 |
|  | nBP | 0.061 | 0.061 | 0.061 | 0.061 | 0.061 |  | 0.807 |
|  | MEP | 86.9 | 84.1 | 52.3 | 51.6 | 27.5 |  | 0.190 |
|  | MiBP | 17.0 | 15.9 | 26.6 | 13.5 | 9.12 |  | **0.011** |
|  | MnBP | 84.6 | 84.8 | 82.1 | 55.3 | 46.5 |  | **0.006** |
|  | MBzP | 0.68 | 0.31 | 0.72 | 0.53 | 0.31 |  | 0.630 |
|  | MEHP | 3.13 | 4.08 | 3.09 | 2.62 | 2.11 |  | 0.761 |
|  | 5-OH-MEHP | 11.7 | 12.9 | 11.2 | 8.90 | 5.62 |  | 0.271 |
|  | 5-oxo-MEHP | 6.91 | 6.70 | 5.83 | 6.77 | 3.42 |  | 0.262 |
|  | 7-cxOP | 2.87 | 3.75 | 2.50 | 3.38 | 2.41 |  | 0.623 |
|  | cx-MINCH | 0.131 | 0.131 | 0.131 | 0.131 | 0.131 |  | 0.838 |
|  | OH-MINCH | 0.111 | 0.111 | 0.111 | 0.111 | 0.111 |  | 0.928 |
|  | BP-3 | 1.10 | 1.37 | 2.19 | 2.26 | 1.11 |  | 0.153 |
|  | BPA | 1.58 | 1.88 | 1.41 | 0.939 | 1.38 |  | 0.077 |
|  | BPF | 0.151 | 0.0802 | 0.146 | 0.121 | 0.104 |  | 0.593 |
|  | TCS | 66.6 | 44.4 | 37.4 | 51.9 | 41.6 |  | 0.294 |
| ***Feed 24 hours before sampling*** | | **No** | **Vegetables** | **Veget. & meat** | **Meat** | **Others** |  |  |
|  | MeP | 66.2 | 37.5 | 102 | 28.9 | 85.4 |  | 0.202 |
|  | EtP | 4.19 | 0.133 | 0.133 | 0.300 | 0.705 |  | 0.121 |
|  | PrP | 13.4 | 3.20 | 10.3 | 4.50 | 12.7 |  | 0.314 |
|  | nBP | 0.0580 | 0.0580 | 0.0580 | 0.0580 | 0.0580 |  | 0.298 |
|  | MEP | 135 | 48.4 | 53.3 | 86.9 | 231 |  | 0.130 |
|  | MiBP | 25.2 | 13.9 | 16.9 | 18.5 | 28.6 |  | 0.629 |
|  | MnBP | 52.6 | 79.1 | 75.2 | 83.3 | 82.1 |  | 0.848 |
|  | MBzP | 0.755 | 0.311 | 0.311 | 0.820 | 0.606 |  | 0.396 |
|  | MEHP | 2.89 | 2.45 | 3.17 | 3.90 | 2.78 |  | 0.388 |
|  | 5-OH-MEHP | 11.9 | 8.39 | 11.4 | 12.8 | 8.36 |  | 0.260 |
|  | 5-oxo-MEHP | 8.05 | 5.31 | 6.18 | 7.85 | 5.47 |  | 0.462 |
|  | 7-cxOP | 1.36 | 1.74 | 2.97 | 4.18 | 4.11 |  | 0.187 |
|  | cx-MINCH | 0.129 | 0.129 | 0.129 | 0.129 | 0.129 |  | 0.588 |
|  | OH-MINCH | 0.112 | 0.112 | 0.112 | 0.112 | 0.112 |  | 0.523 |
|  | BP-3 | 1.52 | 0.995 | 1.37 | 1.24 | 2.48 |  | 0.454 |
|  | BPA | 1.53 | 1.25 | 1.56 | 1.73 | 1.54 |  | 0.427 |
|  | BPF | 0.0559 | 0.134 | 0.125 | 0.151 | 0.117 |  | 0.472 |
|  | BPZ | 0.0228 | 0.0098 | 0.00025 | 0.000 | 0.0124 |  | 0.082 |
|  | TCS | 72.5 | 40.8 | 62.6 | 44.4 | 39.8 |  | 0.452 |
